# Supplementary material for: Synthesis and optical properties of conjugated maleimide molecules containing amino with aggregation-induced emission enhancement (AIEE)
Source: Royal Society of Chemistry journal article supplement (doi:10.1039/d1nj04849j), 2021-12-06
Supplement: d1nj04849j1.pdf [file d1nj04849j1.pdf]

## Supporting information

### Synthesis and optical properties of conjugated maleimide molecules containing amino with aggregation-induced emission enhance (AIEE)

Xiaodong Yang, Kazuhiro Yamabuki and Kenjiro Onimura \*

Department of Applied Chemistry, Graduate School of Sciences and Technology for Innovation, Yamaguchi

University, 2-16-1 Tokiwadai, Ube, Yamaguchi 755-8611, Japan.

E-mail: [onimura@yamaguchi-u.ac.jp](mailto:onimura@yamaguchi-u.ac.jp)

#### 1. NMR Spectra for Products

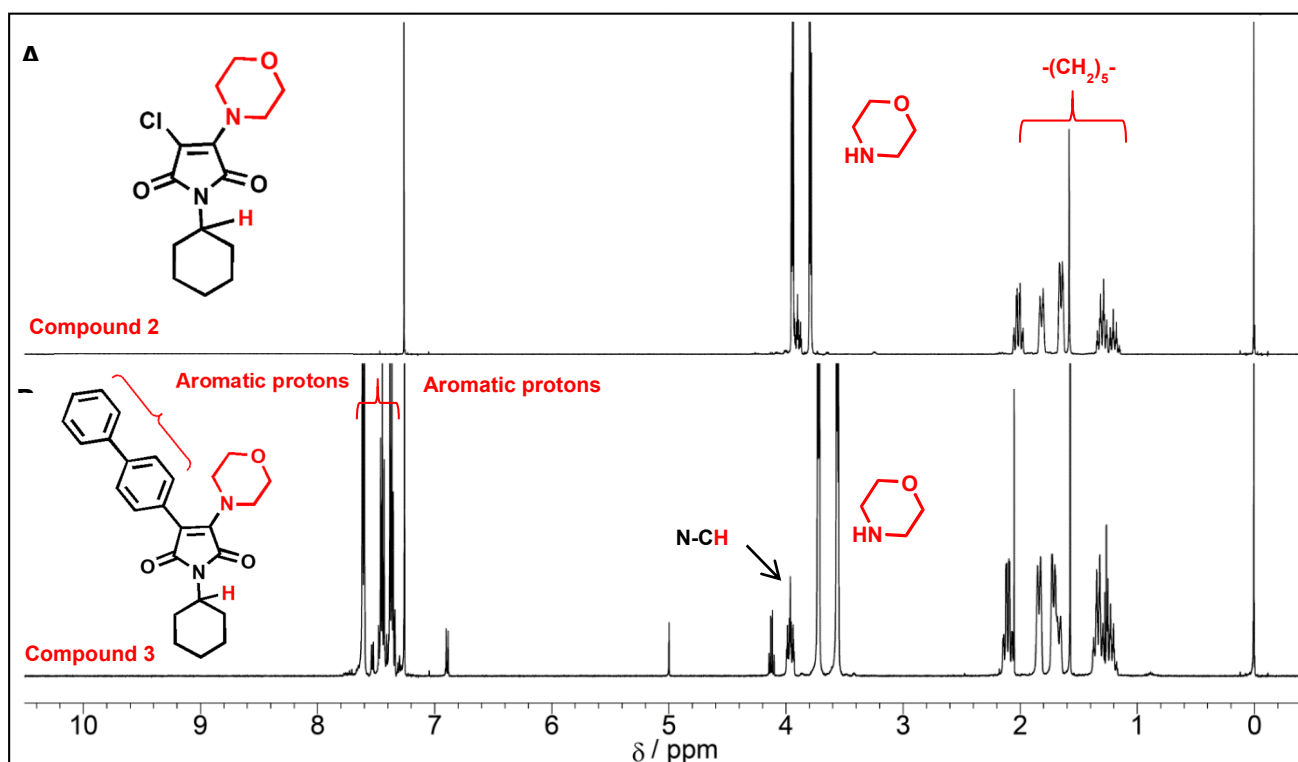

Figure S1 <sup>1</sup>H NMR Spectra of (A) **2** and (B) **3** in CDCl<sub>3</sub>.

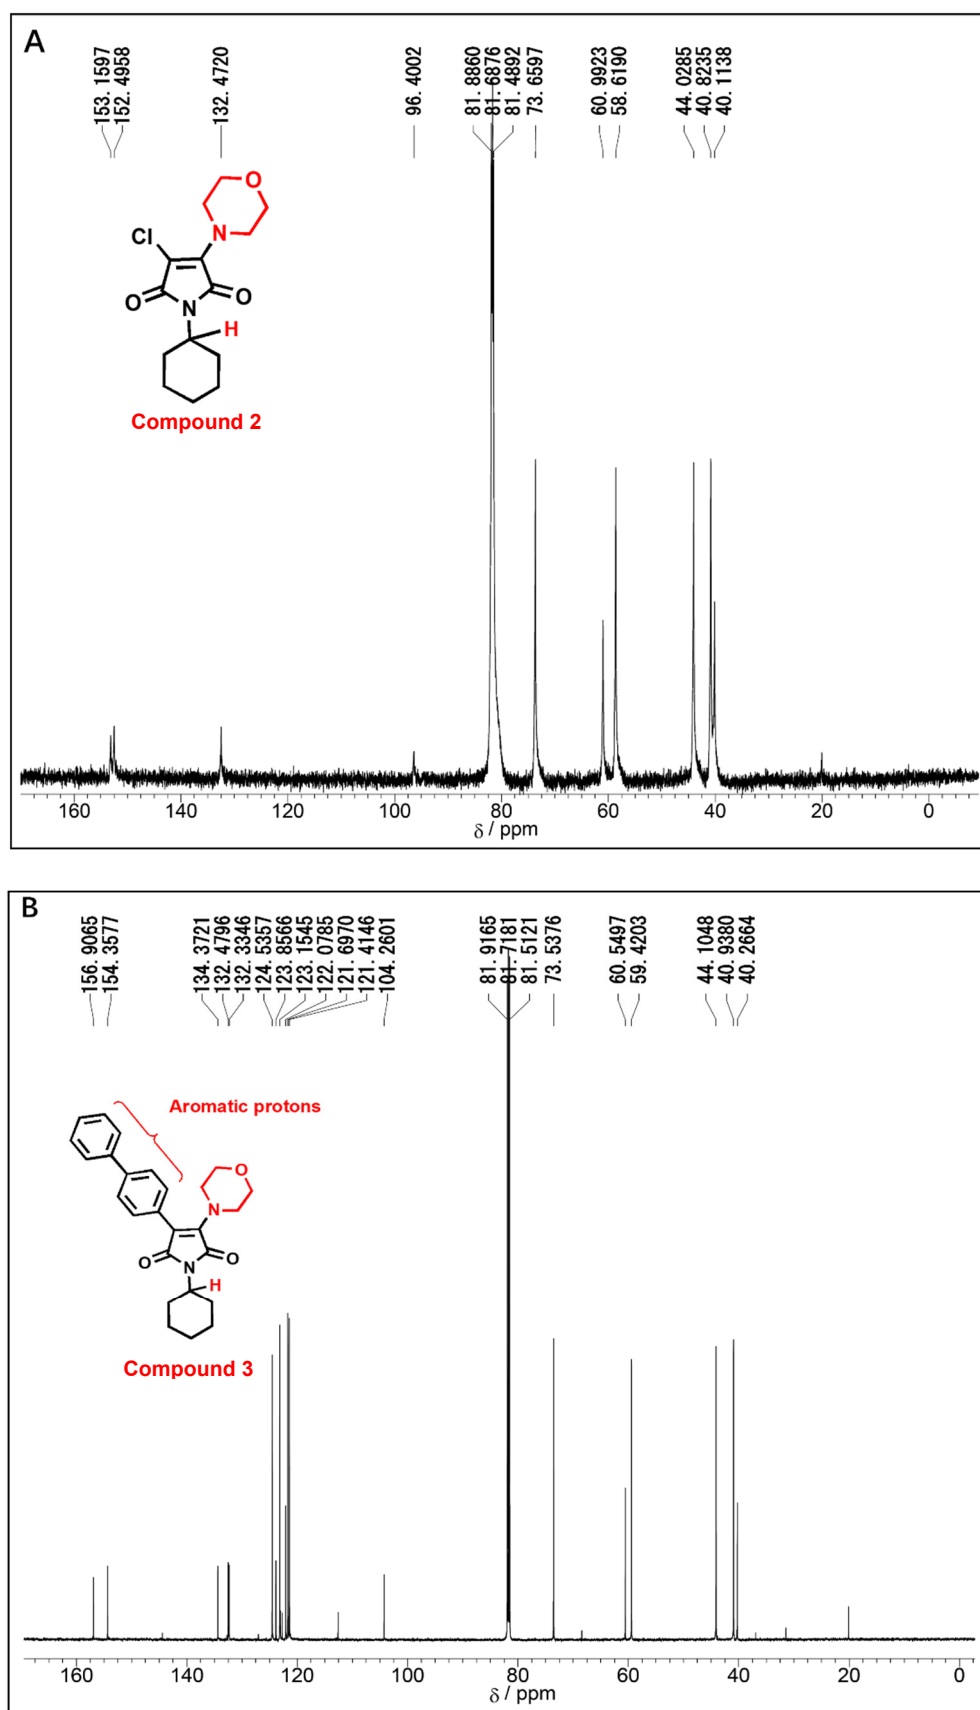

**Figure S2**  $^{13}\text{C}$  NMR Spectra of (A) **2** and (B) **3** in  $\text{CDCl}_3$ .

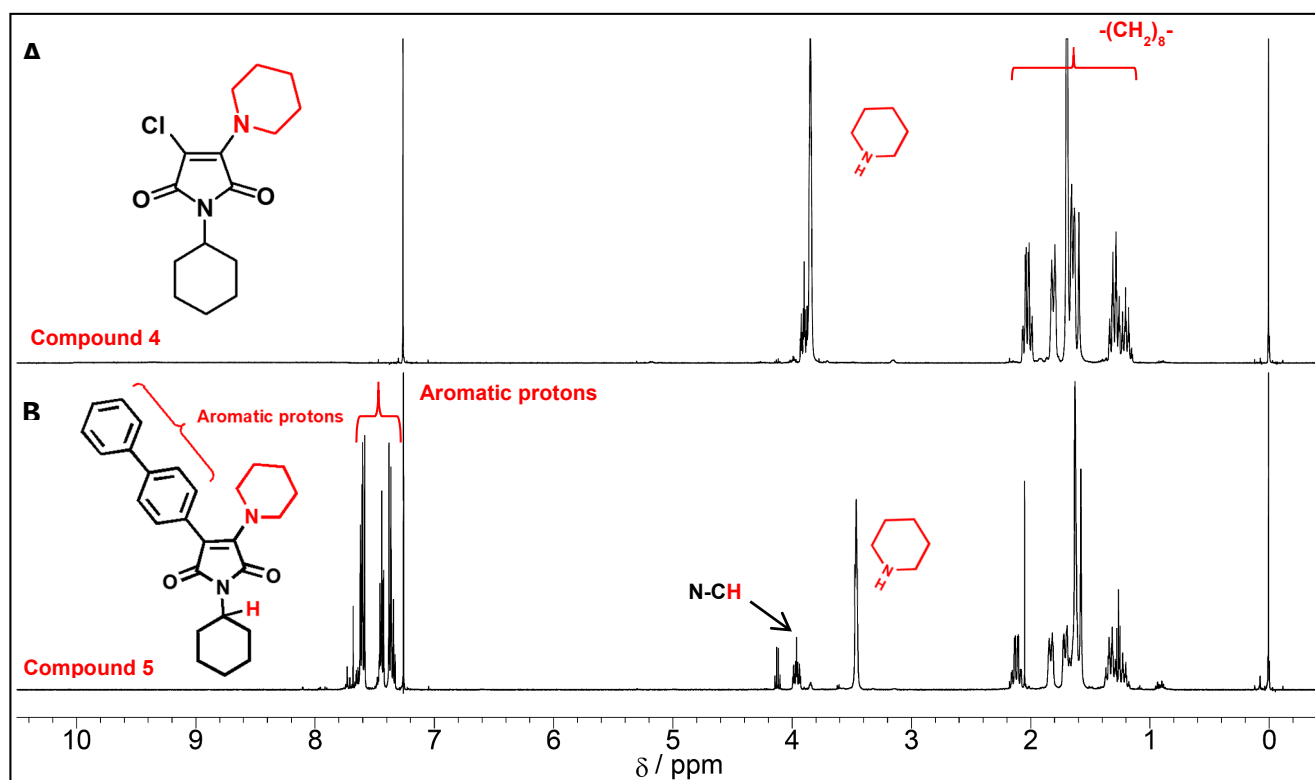

**Figure S3**  $^1\text{H}$  NMR Spectra of (A) **4** and (B) **5** in  $\text{CDCl}_3$ .

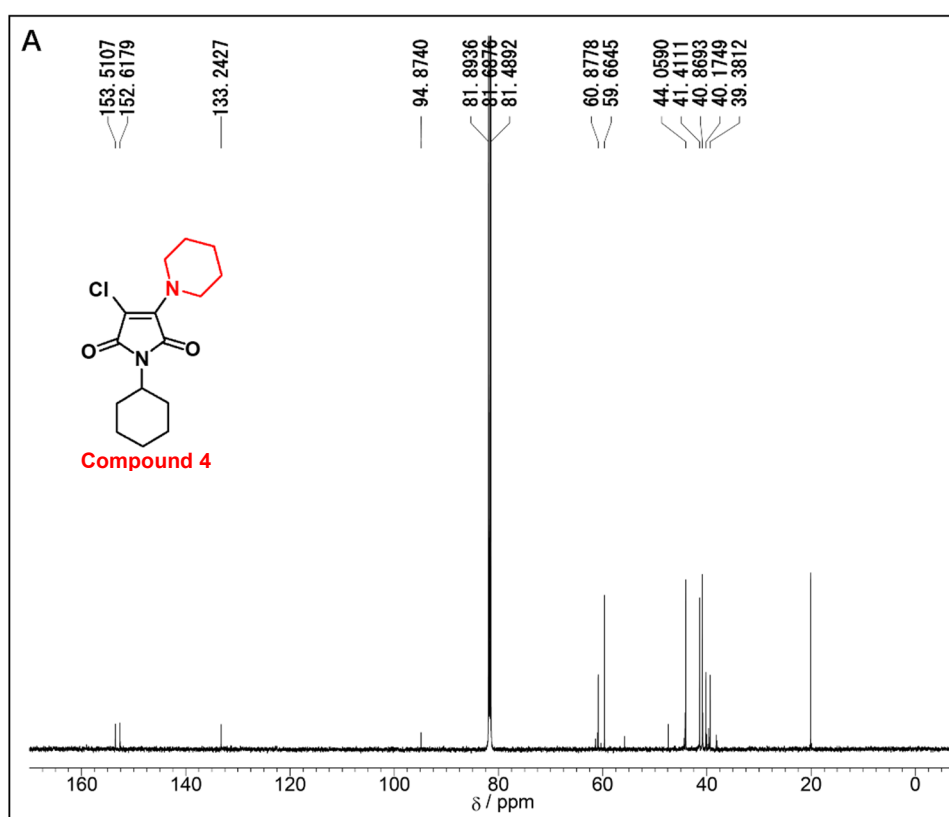

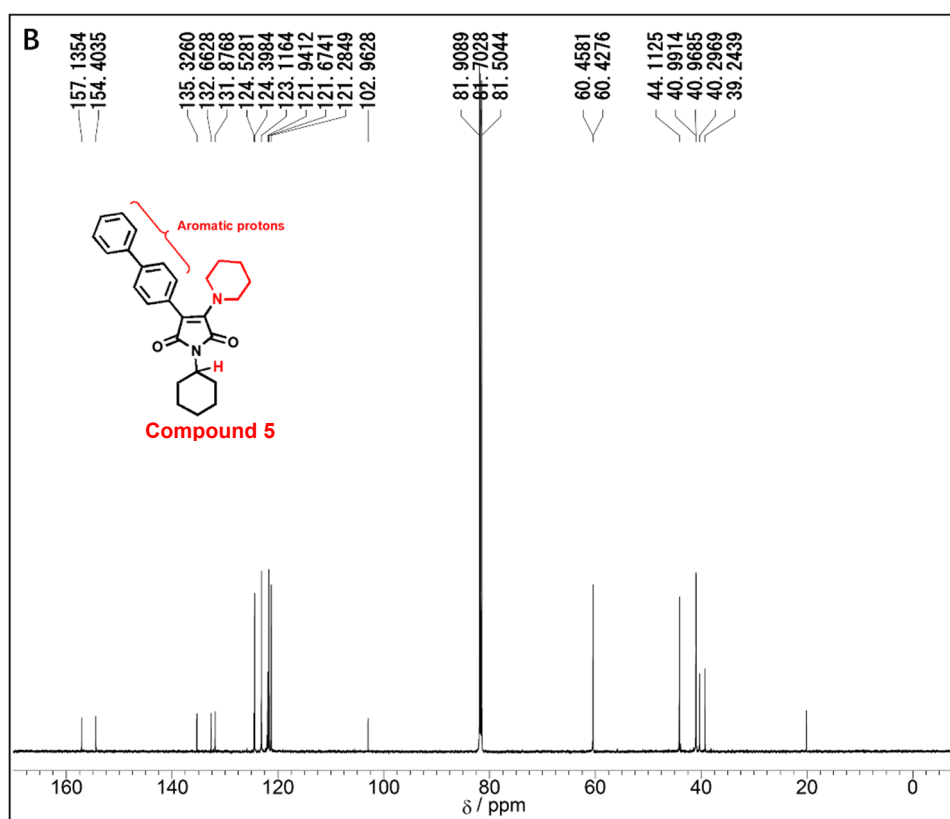

**Figure S4**  $^{13}\text{C}$  NMR Spectra of (A) **4** and (B) **5** in  $\text{CDCl}_3$ .

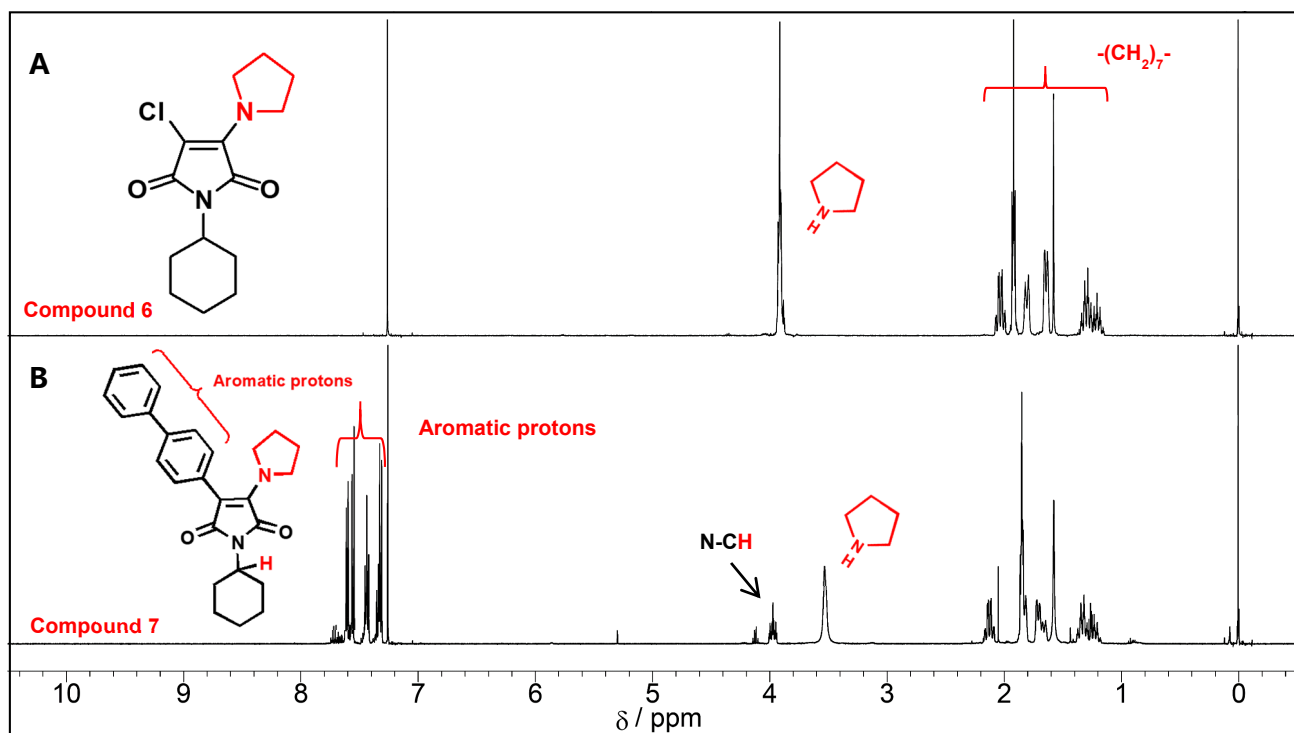

**Figure S5**  $^1\text{H}$  NMR Spectra of (A) **6** and (B) **7** in  $\text{CDCl}_3$

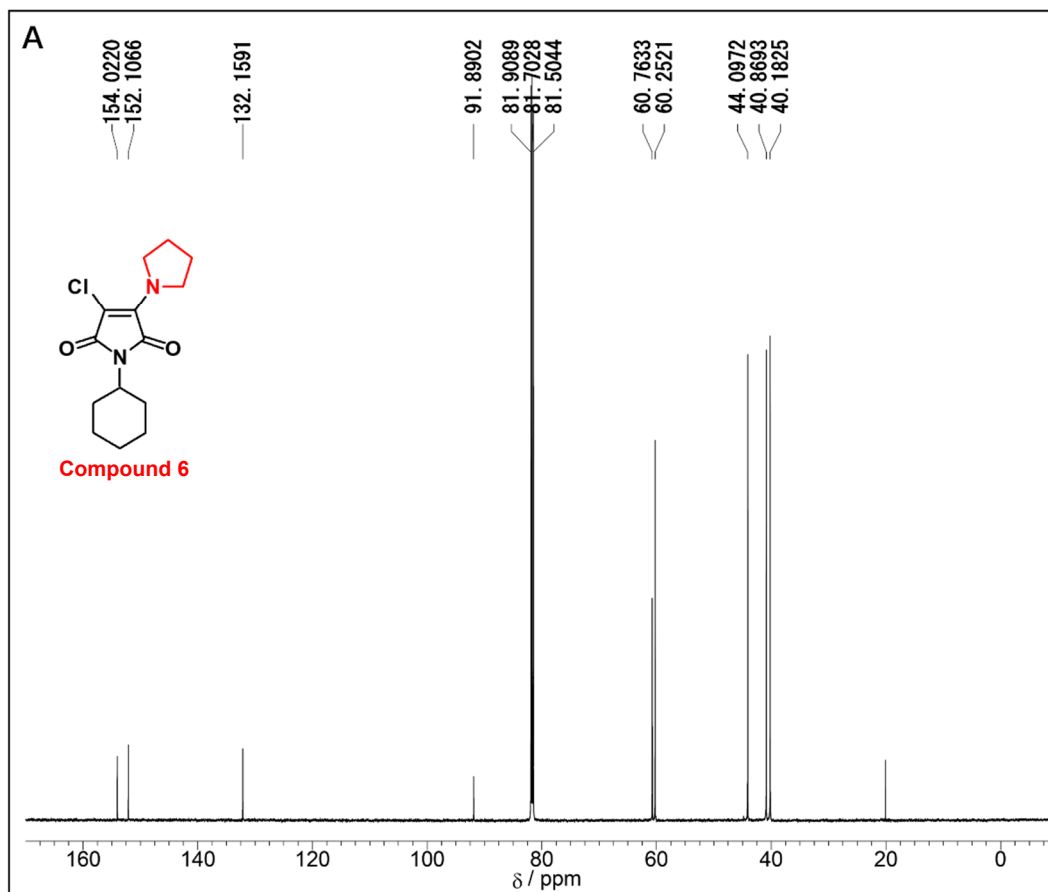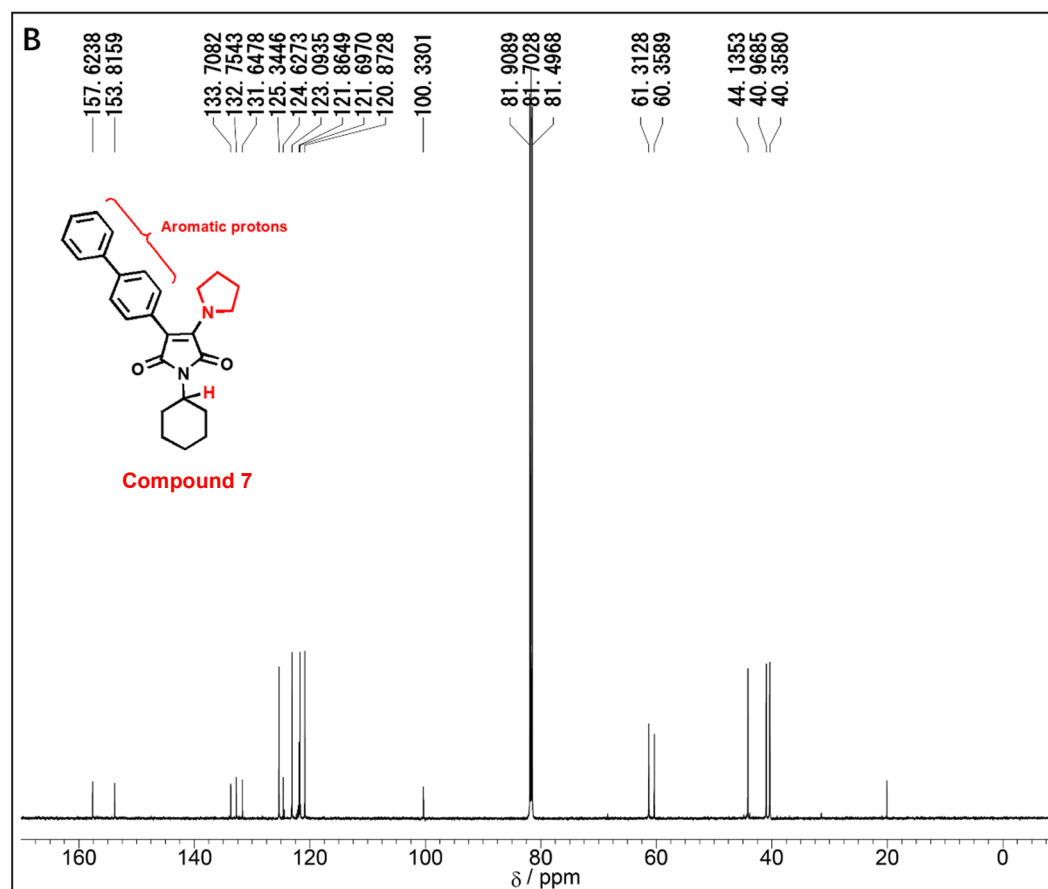

**Figure S6**  $^{13}\text{C}$  NMR Spectra of (A) **6** and (B) **7** in  $\text{CDCl}_3$ .

## 2. UV/Vis absorption spectra and photoluminescence (PL) spectra in different solvents for Products

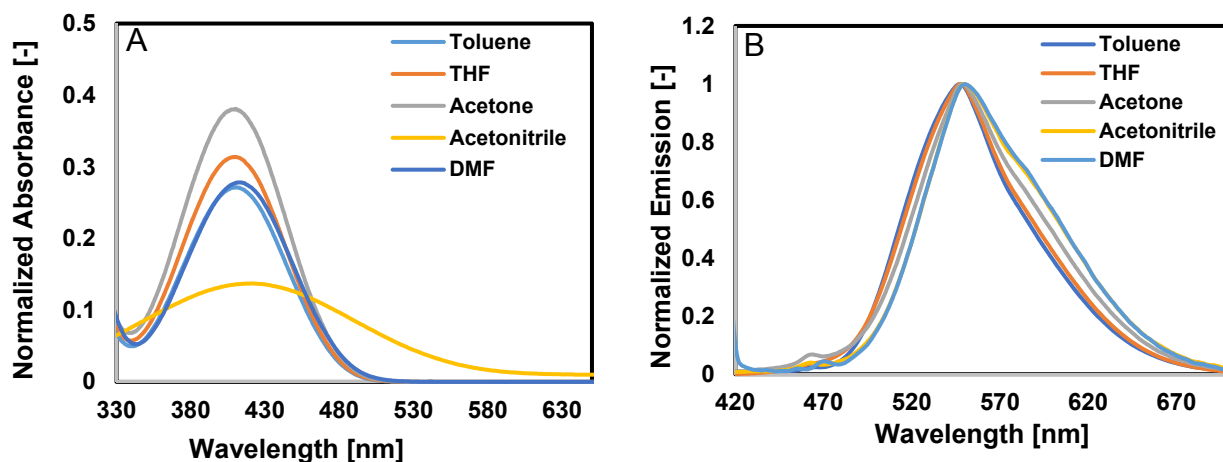

Figure S7 (A) UV spectra and (B) PL spectra of compound 3 in different solvents (*conc.*:  $1.0 \times 10^{-4}$  mol/L).

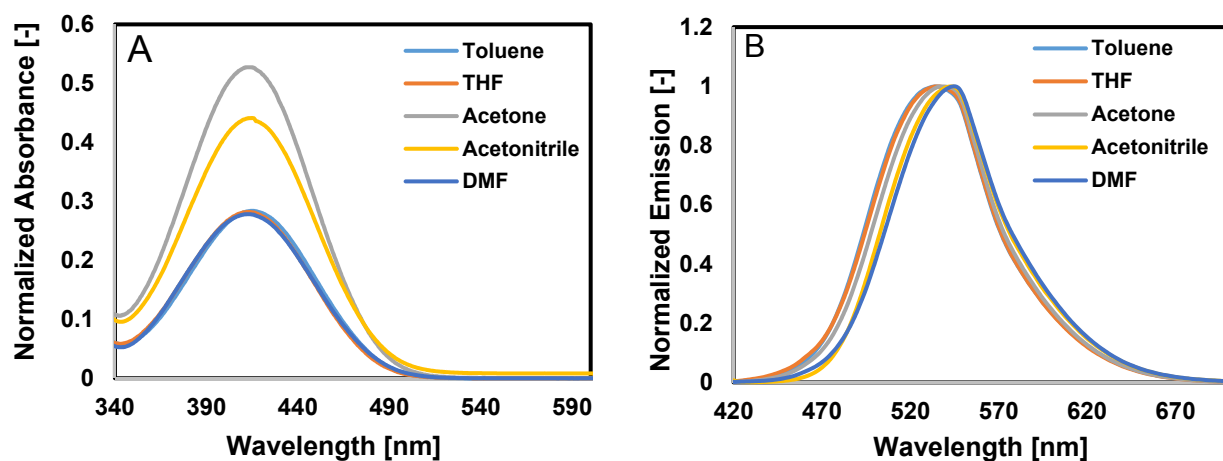

Figure S8 (A) UV spectra and (B) PL spectra of compound 5 in different solvents (*conc.*:  $1.0 \times 10^{-4}$  mol/L).

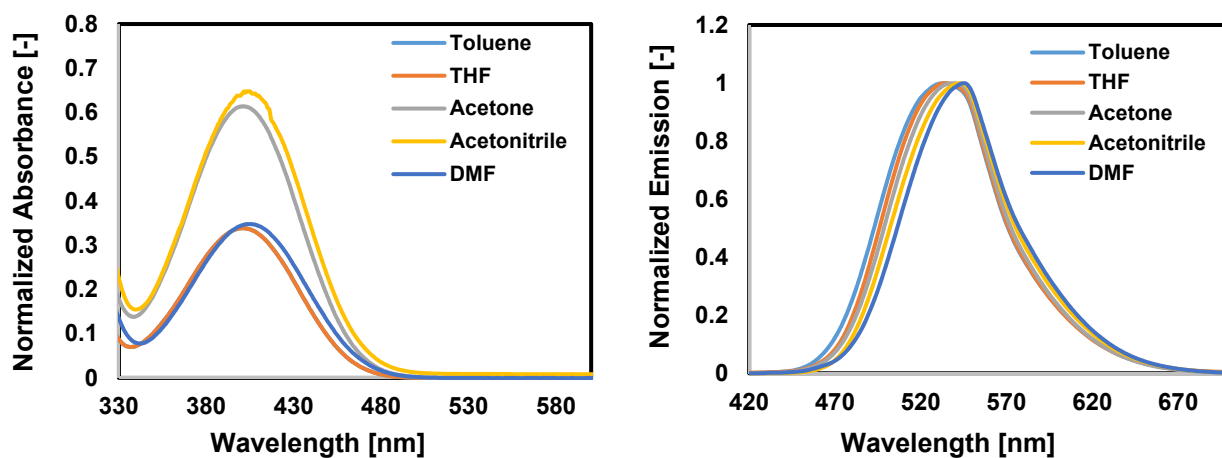

Figure S9 (A) UV spectra and (B) PL spectra of compound 7 in different solvents (*conc.*:  $1.0 \times 10^{-4}$  mol/L).
